# Supplementary material for: Measurement report: New insights into the mixing structures of black carbon on the eastern Tibetan Plateau – soot redistribution and fractal dimension enhancement by liquid–liquid phase separation
Source: Copernicus journal article supplement (doi:10.5194/acp-23-9385-2023), 2023-08-24
Supplement: Supplementary file 1 [file acp-23-9385-2023-supplement.pdf]

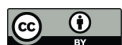

*Supplement of*

**Measurement report: New insights into the mixing structures of black carbon on the eastern Tibetan Plateau – soot redistribution and fractal dimension enhancement by liquid–liquid phase separation**

**Qi Yuan et al.**

*Correspondence to:* Weijun Li (liweijun@zju.edu.cn)

The copyright of individual parts of the supplement might differ from the article licence.

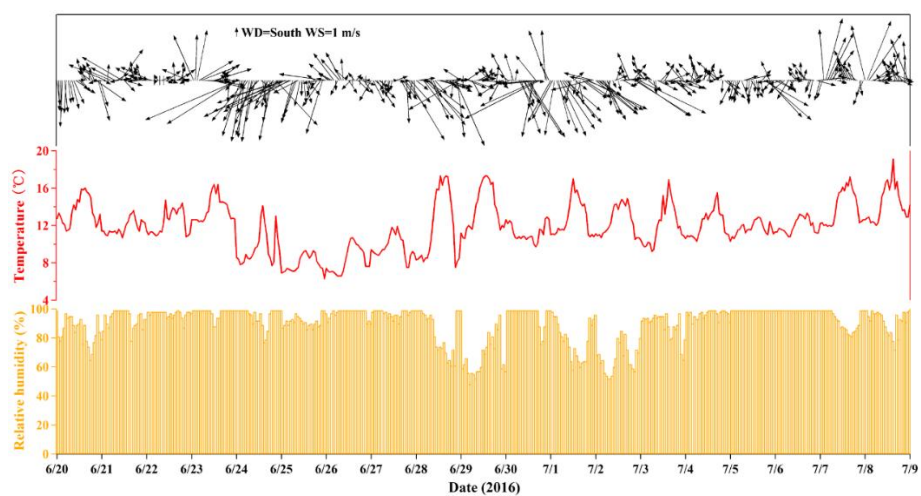

**Figure S1.** Weather conditions during sampling period, including relative humidity (RH), temperature (T), wind speed (WS) and wind direction (WD).

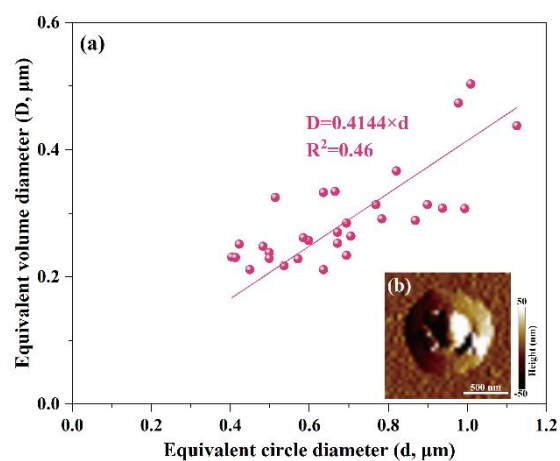

**Figure S2.** (a) The correlation of equivalent circle diameter (ECD,  $d$ ) and the equivalent volume diameter (EVD,  $D$ ) obtained by AFM. (b) An AFM image of an OM-coating particle.

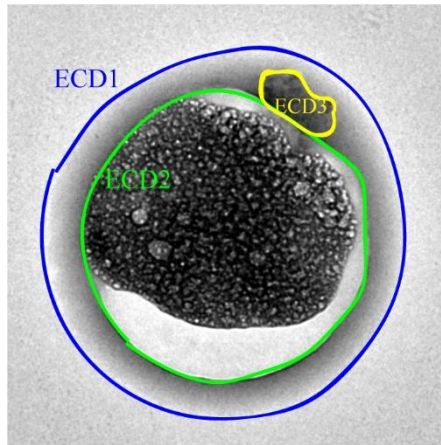

**Figure S3.** The calculation diagram of the ratio of OM coating thickness to soot size (OM/soot) of a typical S-soot-OM-coating particle.  $OM/soot = [0.4144(ECD1-ECD2)/2]/ECD3$

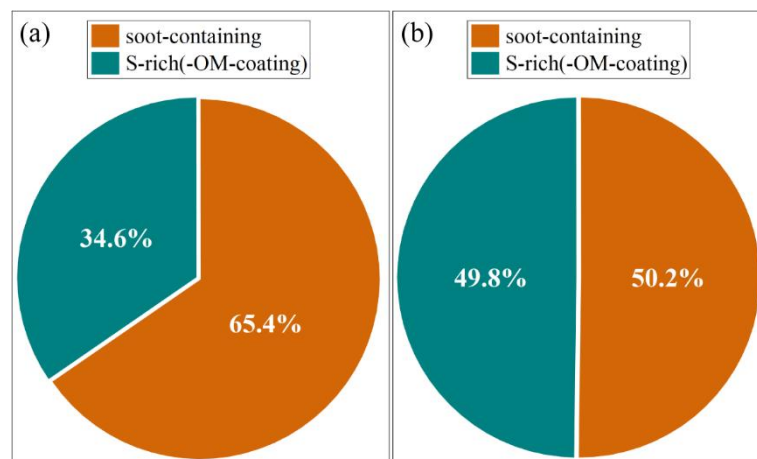

**Figure S4.** (a) Relative abundance of soot-containing particles at Mt. Emei site during the eastern basin trajectories prevailing. (b) Relative abundance of soot-containing particles at Mt. Emei site during the western TP trajectories prevailing.

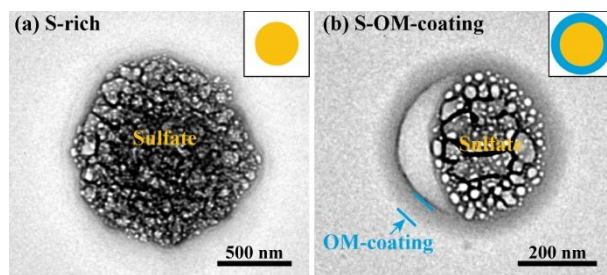

**Figure S5.** The other two major types of individual particles besides soot-containing particles in this study. (a) S-rich, which is mainly produced by  $\text{SO}_2$  conversion and appears as cystose mass under electron beam. (b) S-OM-coating, which appears a core-shell structure with a sulfate core and an OM-coating. All the conceptual graphs are placed in the top right corner of each image. The yellow circles and blue rings represent sulfate and OM-coatings, respectively.
